# Supplementary material
Source: publisher site journal article supplement (https://cdn.jamanetwork.com/ama/content_public/journal/jama/0/jsc200001supp4_prod.pdf)
Supplement: Supplementary file 1 [file jsc200001supp4_prod.pdf]

## Supplementary Online Content

Greer DM, Shemie SD, Lewis A, et al. Determination of brain death/death by neurologic criteria: The World Brain Death Project. *JAMA*. doi:10.1001/jama.2020.11586

### **Supplement 4.** Minimum Clinical Criteria for Determination of Brain Death/Death by Neurologic Criteria

This supplementary material has been provided by the authors to give readers additional information about their work.

## Minimum Clinical Criteria for Determination of Brain Death/Death by Neurologic Criteria

Panayiotis Varelas, MD, PhD<sup>1</sup>, Fernando Goldenberg, MD<sup>2</sup>, Ariane Lewis, MD<sup>3</sup>, Sam D. Shemie, MD<sup>4</sup>,  
Gene Sung, MD, MPH<sup>5</sup> Sylvia Torrance, BSc<sup>6</sup>, David Greer, MD, MA<sup>7</sup>

1) Albany Medical Center, Albany, USA; 2) University of Chicago, Chicago, USA; 3) NYU Langone Medical Center, New York, USA; 4) McGill University, Montreal Children's Hospital, Montreal, Canada; 5) University of Southern California, Los Angeles, USA; 6) Canadian Blood Services, Ottawa, Canada; 7) Boston University School of Medicine, Boston, USA

### Abstract

*Introduction* Determination of brain death/death by neurologic criteria (BD/DNC) is a complex process. The steps for making a determination of BD/DNC vary around the world.

*Methods* We conducted a review of the literature and formulated recommendations with an expert panel on the minimum clinical criteria for determination of BD/DNC in an effort to avoid false positive declaration of death.

*Results and Conclusions* Despite variations in some of the details associated with determination of BD/DNC, the core tenets of BD/DNC determination (devastating brain injury resulting in irreversible coma, brainstem areflexia, and the inability to breathe spontaneously) are agreed upon. We provide recommendations and suggestions for the minimum clinical criteria for determination of BD/DNC. Countries/medical societies/institutions should feel free to pursue additional requirements beyond these minimum clinical criteria in accordance with local/regional laws and practices.

---

### Introduction

Determination of brain death/death by neurologic criteria (BD/DNC) is a complex process that requires familiarity and expertise and must be followed diligently in order to avoid mistakes that may lead to false positive declaration of death. However, it is worth emphasizing that the false positive rate in BD/DNC determination is unknown. In this section, we aim to establish the minimum clinical criteria needed to make the diagnosis of BD/DNC in adults based on review of the literature and expert consensus, erring on the conservative side to ensure that there are no diagnostic errors. Establishing minimum clinical criteria for determination of BD/DNC and ensuring the proper documentation through use of a checklist (refer to Documentation of Brain Death chapter), will enhance the rigor of the process. Countries/medical societies/institutions should, of course, feel free to pursue additional requirements beyond these minimum clinical criteria in accordance with local/regional laws and practices.

### Methods

Authors conducted the initial literature searches of the Cochrane, Embase and MEDLINE databases for the time period between January 1, 1992 and July 2017. Subsequent searches were performed to

capture relevant articles between July 2017 and April 2020. Because of the significant lack of data from randomized controlled trials or large studies, GRADE evaluation of the evidence was not performed. However, evidence was reviewed by a multidisciplinary group of clinicians (see Introduction chapter) and recommendations were generated according to the following criteria. Strong recommendations (“It is recommended that”) were based on expert consensus that clinicians should follow the recommendation unless a clear and compelling rationale for an alternative approach was present, and where actions could be adopted as policy. Even though most evidence in this area is limited and of low-quality, strong recommendations were made as a precautionary, conservative approach, to prevent premature or erroneous determinations of death (false positives). Conditional or weak recommendations (“It is suggested that”) were generated when there were potentially different options and the best action may differ depending on circumstances, patients, resources or societal values, or where there is a need for further evidence or discussion among clinicians and stakeholders. In cases where there was insufficient evidence and the balance of benefits versus harms was neutral, no recommendations were made.

## I. Prerequisites and Confounders

Determination of BD/DNC around the world begins by establishing that 1) the clinical history, etiology and neuroimaging demonstrate that the person has suffered irreversible devastating brain injury leading to loss of all brain functions, and thus is compatible with BD/DNC; and 2) there are no confounders that could make the person appear to have irreversible brain injury, when, in fact, this is not the case.<sup>1,2</sup> There have been several reports of reversible mimics of BD/DNC in the setting of diffuse leptomeningeal carcinomatosis,<sup>3</sup> fulminant Guillain-Barré syndrome and its Miller-Fisher or axonal sensorimotor neuropathy variants<sup>4-12</sup> (also including a recent case with overlap with Bickerstaff brainstem encephalitis),<sup>13</sup> rabies encephalitis,<sup>14</sup> snake bites,<sup>15,16,17</sup> botulism,<sup>18</sup> severe hypokalemia<sup>19</sup> and high cervical cord injuries.<sup>20</sup> Reports of drug, metabolic and hemodynamic derangements falsely suggesting BD/DNC have also been described.<sup>21-25</sup> See Table 1 for a list of confounders to the determination of BD/DNC.

**Table 1. Examples of confounders of the clinical diagnosis of brain death**

| <b>Disease Process</b>                 | <b>Possible exam components confounded</b>                                            |
|----------------------------------------|---------------------------------------------------------------------------------------|
| Hypothermia                            | Complete exam                                                                         |
| Muscular paralysis                     | Complete exam                                                                         |
| Sedation/analgesia                     | Complete exam                                                                         |
| Hypoxia                                | Complete exam                                                                         |
| Hypotension                            | Complete exam                                                                         |
| Hypoglycemia                           | Complete exam                                                                         |
| Endocrine or metabolic abnormality     | Complete exam                                                                         |
| Basal skull fracture with hemotympanum | Oculovestibular reflex                                                                |
| Facial trauma                          | Pupillary response, oculovestibular and oculocephalic reflexes, cranial pain response |
| Pulmonary injury/ disease              | Apnea test                                                                            |
| Cervical spine injury                  | Corporal pain response, apnea test                                                    |
| Anophthalmia                           | Pupillary, corneal, oculovestibular and oculocephalic reflexes                        |

There have been numerous reports of drugs, alcohol or prescription medications interfering with a determination of BD/DNC as they can cause both reversible coma and transient brainstem areflexia.<sup>21-23,26-34</sup> Non-sedative prescription medications that have been implicated as BD/DNC evaluation confounders include valproic acid, tricyclic antidepressants, bupropion, baclofen, and several antibiotics (aminoglycosides, tetracyclines, minocycline, vancomycin, isoniazide or ethambutol).<sup>26-32</sup> Organophosphate insecticides can also lead to deep coma with absent brainstem reflexes, but recovery is possible after 5-15 days.<sup>33</sup> It is worth noting that fixed and dilated pupils are not consistent with the presence of opioids, and that Narcan administered to decedents can elicit spinally-mediated reflexes. Because the effects of these substances are reversible, it is widely advised to delay a determination of BD/DNC if these substances are present in a person's system and continue to support the person until these substances are cleared.<sup>21,22</sup> However, clearance may be a slow process and can be delayed for days in the setting of poor renal or hepatic function. For some substances, such as benzodiazepines, levels can be serially monitored with immunoassays and high-performance liquid chromatography or gas chromatography-mass spectrometry.<sup>35-37</sup> Some hospitals dictate specific levels for sedatives prior to a BD/DNC determination, such as a barbiturate level <10 mg/L, midazolam level <10µg/L or thiopentone level <5 mg/L.<sup>38,39</sup> If levels for a particular substance cannot be measured, protocols advise either determination of clearance based on the substance's half-life or utilization of ancillary testing.<sup>39-41</sup> Half-lives of drugs whose clearance 1) frequently needs to be considered when making a determination of BD/DNC and 2) often cannot be assessed with quantitative or qualitative toxicology tests are listed in Table 2.

**Table 2. Half-lives of drugs that may need to be considered when making a determination of BD/DNC**

|                  | <b>Drug</b>     | <b>Half-life<sup>42</sup></b> |                                                                                       |
|------------------|-----------------|-------------------------------|---------------------------------------------------------------------------------------|
| <b>Opioids</b>   | Fentanyl        | 3.3-4.1 hours                 | ↑CPBS, Aged, Prem; ↔Child                                                             |
|                  | Oxycodone       | 2.1-3.1 hours                 |                                                                                       |
| <b>Sedatives</b> | Dexmedetomidine | 2 hours                       |                                                                                       |
|                  | Diazepam        | 30-56 hours                   | ↑Aged, LD; ↔HTh                                                                       |
|                  | Lorazepam       | 9-19 hours                    | ↑LD, Neo, RD; ↔Aged, CPBS, AVH; ↓Burn                                                 |
|                  | Midazolam       | 1.3-2.5 hours                 | ↑Aged, Obese, LD; ↔Smoking                                                            |
|                  | Pentobarbital   | 15-50 hours                   |                                                                                       |
|                  | Phenobarbital   | 81-117 hours                  | ↑LD, Aged; ↓Child; ↔Epilepsy, Neo                                                     |
|                  | Thiopental      | 8-10 hours                    |                                                                                       |
|                  | Propofol        | 2.3-4.7 hours                 | A much longer terminal t <sub>1/2</sub> was reported following prolonged IV infusion. |
|                  | Zolpidem        | 1.7-2.1 hours                 | ↑Aged, LD; ↔RD; ↓Child                                                                |
| <b>Other</b>     | Baclofen        | 2.8-4.7 hours                 |                                                                                       |
|                  | Bupropion       | 10-11 hours<br>(7.9-18.4)     | ↑Aged, LD; ↔Alcohol                                                                   |

AVH Acute viral hepatitis; CPBS cardiopulmonary bypass surgery; HTh Hyperthyroid; LD Chronic liver disease; Neo neonate; Prem Premature infants; RD renal disease.

However, it is worth noting that the pharmacodynamic and pharmacokinetic properties of drugs are altered when persons are critically ill, have impaired hepatorenal function or were treated with targeted temperature management, so projections of clearance based on half-life data derived from less ill persons or normal volunteers may be inaccurate.<sup>43</sup> A recent position statement from the American College of Medical Toxicology (ACMT) emphasized that 5 half-lives is a minimum, and one should wait longer in the setting of overdose, delayed absorption, delayed elimination or interaction with another agent.<sup>44</sup>

One other class of drugs that can falsely suggest BD/DNC is neuromuscular blocking agents. Non-depolarizing neuromuscular blocking agents do not readily cross the intact blood–brain barrier, but they cause skeletal muscle paralysis.<sup>24</sup> Because of this, some protocols recommend that presence of paralytics be excluded by using a train-of-four stimulator to demonstrate that 4 twitches are present prior to conducting a determination of BD/DNC.<sup>39</sup> In addition, it is reasonable to take into account the pharmacokinetic properties of the neuromuscular blocking agent used, any confounders to their metabolism, and the presence or absence of deep tendon reflexes.<sup>45</sup>

While many protocols indicate that severe metabolic derangements could compromise the clinical evaluation and should be excluded, the definition of “severe” is vague. There are no universally agreed upon established levels for electrolytes, creatinine, glucose or hepatic enzymes. Nonetheless, protocols frequently recommend correcting severe acid-base disorders, acute hepatic failure, acute renal failure with severe uremia, hyper- or hypokalemia, hyponatremia, hyper- or hypophosphatemia, hypermagnesemia, hypercalcemia, hypo- or hyperglycemia, and severe hormonal deficits (like severe myxedema or adrenal failure) based on subjective judgement before a determination of BD/DNC is performed.<sup>38-41,46</sup>

Lastly, the need for normal temperature and blood pressure prior to a BD/DNC evaluation is widely described, but the definition of “normal” varies.<sup>38,40,41,47,48</sup> A temperature of 36°C or above and a systolic blood pressure of at least 100 mmHg were embraced by the 2010 American Academy of Neurology (AAN) Guidelines.<sup>40</sup> In the United Kingdom, a temperature  $\geq 34^{\circ}\text{C}$  and a mean arterial pressure (MAP)  $> 60$  mmHg are required.<sup>39</sup> In Australia and New Zealand, the temperature must be  $> 35^{\circ}\text{C}$  and the systolic blood pressure must be  $> 90$  mmHg or the MAP  $> 60$  mmHg.<sup>41</sup> The AAN Guidelines are currently the most conservative, but nonetheless, their recommended values are easily achievable in most patients.<sup>40</sup> Much could be gained by standardizing temperature and blood pressure parameters worldwide.

### **Establish that Loss of Brain Function is Total and Constant Over Time**

Once it has been established that 1) the clinical history, etiology and neuroimaging demonstrate that the person has suffered irreversible devastating brain injury leading to loss of capacity for consciousness (i.e. coma) due to an etiology capable of causing BD/DNC and 2) there are no confounders that could make the person appear to have irreversible brain injury, it must be established that the loss of brain function is total and constant over time. To accomplish this, some countries’ guidelines require an observation period before a BD/DNC exam is even considered in order to assure irreversibility.<sup>1,49</sup> The common lengths of observation range from 2-24 hours.<sup>1</sup> The observation period is particularly important after cardiac arrest because there can be slow recovery of brainstem function after successful resuscitation. This is also the case after treatment with targeted temperature management.<sup>25,50</sup> (Refer to the chapter on Determination of Brain Death after Treatment with Targeted Temperature Management.) As with all criteria for BD/DNC determination, the waiting period is arbitrary; clinicians must always come

back to the cardinal rule – if irreversibility is uncertain, determination of death should not proceed; whatever time is necessary to ensure irreversibility should be taken.

### **Recommendations and Suggestions**

1. It is recommended that pathological conditions, confounders and/or reversible conditions that may mimic BD/DNC be excluded prior to commencing a determination of BD/DNC.
2. It is recommended that, prior to commencing a determination of BD/DNC, it must be demonstrated that the person has an established neurological diagnosis, the nature and severity of which is capable of resulting in the irreversible loss of the capacity for consciousness, the irreversible loss of all brainstem reflexes, and the irreversible loss of the ability to spontaneously breathe in the face of a carbon dioxide and acidosis challenge.
3. It is suggested that prior to making a determination of BD/DNC, there be
  - a. neuroimaging evidence of intracranial hypertension (severe cerebral edema and herniation), or
  - b. intracranial pressure measurements that equal or exceed the mean arterial pressure.
4. It is suggested that in the absence of herniation on neuroimaging, caution be taken when considering an evaluation for BD/DNC.
5. It is suggested that the following prerequisites be met before an evaluation for determination of BD/DNC is performed:
  - a. The person should have a minimum core temperature of 36°C, as defined by esophageal, bladder, rectal or central venous or arterial catheter temperature measurements, with use of a warming blanket, automated temperature regulation device, thermal mattress, warmed fluids and/or warmed oxygen as needed,
  - b. Adults should have a systolic blood pressure of  $\geq 100$  mmHg, or a mean arterial pressure  $\geq 60$  mmHg and there be age appropriate targets in pediatrics, with use of vascular volume, vasopressors and/or inotropes as needed.
6. It is recommended that the following confounders be eliminated before an evaluation for determination of BD/DNC is performed:
  - a. Pharmacologic paralysis must be excluded through use of a train-of-four stimulator if available, or assessment of the presence of deep tendon reflexes if a train-of-four-stimulator is not available.
  - b. The influence of central nervous system (CNS) depressing medications including toxins, taking into consideration the elimination half-life that may be prolonged by organ dysfunction and/or hypothermia, be excluded by:
    - i. Use of a toxicology screen if there is concern for a toxic exposure, and
    - ii. Serially measuring drug levels to ensure they do not exceed the therapeutic range, and, even if within the therapeutic range, are not felt to confound the clinical examination, or

- iii. Allowing 5 elimination half-lives to pass before an evaluation for BD/DNC be made (assuming normal hepatic and renal function), or
  - iv. Performing ancillary testing in addition to the complete clinical examination and apnea test if there is concern about prolonged or unknown drug elimination.
- c. If alcohol intoxication is suspected or confirmed, the alcohol blood level must be  $\leq 80$  mg/dL.
  - d. Severe metabolic, acid-base and endocrine derangements that could impact the examination must be corrected. If these derangements cannot be corrected and are judged to be potentially contributing to the loss of brain function while the complete clinical examination and apnea test are consistent with BD/DNC, ancillary testing should be performed to confirm this determination.
- 7. It is recognized that interventions to decrease intracranial pressure, such as hyperosmolar therapy, ventricular drainage and decompressive craniectomy, should be applied when clinically indicated during therapeutic phases of care. It is recommended that if these types of interventions are not indicated for the treatment of devastating brain injury, they should not be performed simply for the purpose of demonstrating irreversibility of the clinical state.
  - 8. It is recommended that an adequate observation period take place prior to clinical testing for BD/DNC.
    - a. A minimum of 24 hours is recommended specifically for anoxic brain injury after resuscitated cardiac arrest. (Refer to the chapter on Determination of Brain Death after Treatment with Targeted Temperature Management for guidance on determination of BD/DNC in the setting of hypothermia.)
    - b. The time period for other brain injuries has not been established and should be determined on a case-by-case basis. As a general rule, clinicians should err toward caution, and if there is uncertainty about the potential reversibility of the clinical state, for any reason, the observation time should be the time felt necessary to exclude reversibility without any doubt.

## II. Clinical Testing

It is universally agreed that the clinical evaluation for determination of BD/DNC includes an assessment for coma and an evaluation of brainstem areflexia to demonstrate that: 1) pupils are fixed in a midsize or dilated position, and are nonreactive to light (as determined with the naked eye, magnifying glass or a pupilometer)<sup>1,2,39-41,51</sup> (some have used 4 mm as the cutoff for the smallest pupillary diameter, but this is arbitrary and smaller pupils have been reported to be compatible with BD/DNC, although the clinician should always be alert to the possibility of drug intoxication with smaller pupils<sup>52</sup>); 2) the corneal, oculocephalic and oculovestibular reflexes are absent; 3) there is no facial movement to noxious stimulation; 4) the gag reflex is absent to bilateral posterior pharyngeal stimulation; 5) the cough reflex is absent to tracheal suctioning; and 6) there is no brain-mediated motor response to noxious stimulation of the limbs.<sup>1,2,39-41</sup> Some protocols include performance of an atropine test to assess the lack of unopposed

vagal tone inhibition at the sinoatrial node through blockade of muscarinic receptors (i.e. lack of tachycardic response >3% above the baseline heart rate after 2-3 mg of atropine is administered intravenously), but this test is not frequently used, and can affect pupillary reflexes.<sup>1,2,39-41,53</sup>

Although, by definition, there is no brain- or brainstem-mediated activity in a person who is brain dead, the presence of spinal reflexes in this population is well-described. Spinal reflexes can be minor or dramatic and their duration varies. They have been reported to occur in 13-75% of decedents.<sup>54-66</sup> A systematic review and categorization of these movements in 235 decedents by Spittler et al. showed significant inter-individual and intra-individual diversity.<sup>59</sup> In another study of 278 BD/DNC examinations, 42 (15%) persons had polysegmental spinal reflex or automatism patterns.<sup>59</sup> Sometimes, it is difficult even for experienced practitioners to identify the origin of these movements, especially if they are complex.<sup>54,59</sup> The most common movements described are finger and toe jerks,<sup>55</sup> undulating toe flexion, triple flexion,<sup>56</sup> increased tendon reflexes (in legs more than arms),<sup>57,65</sup> plantar flexion, and myoclonus.<sup>58</sup> The presence of spontaneous abdominal contractions needs to be carefully assessed to distinguish spontaneous breathing from spinal reflexive activity.<sup>61</sup> Head turning during the BD/DNC exam in response to nociceptive stimuli below the foramen magnum is also a spinal reflex.<sup>67-69</sup> The Lazarus sign can occur spontaneously or be elicited by various stimuli (respirator removal, passive neck flexion, oculocephalic reflex testing or hypotension),<sup>54,55,62-64</sup> but it is rarely seen (it only occurred in 3-12% of decedents in some series).<sup>56-58</sup> Repetitive leg movements mimicking periodic leg movements during sleep have also been reported.<sup>65</sup> A list of some of the spinal reflexes that have been described is provided in Table 3.

**Table 3. Described spinal reflexes in BD/DNC**

| Reflex                                   | Description                                                                                                                           |
|------------------------------------------|---------------------------------------------------------------------------------------------------------------------------------------|
| Decerebrate-type movements <sup>54</sup> | Spontaneous extension of the extremities                                                                                              |
| Extensor posturing <sup>54</sup>         | Back arching to the left or right                                                                                                     |
| Eyelid opening <sup>54</sup>             | Opening of the eyelids after nipple stimulation                                                                                       |
| Fasciculation <sup>56</sup>              | Twitching of contiguous groups of muscle fibers                                                                                       |
| Head turning <sup>54,67-69</sup>         | Intermittent head turning from side to side every 10-30 seconds with or without extension of the upper extremities                    |
| Hugging <sup>54</sup>                    | Flexion of the trunk and movement of the arms in a hugging-like manner                                                                |
| Lazarus sign <sup>54-58,62-64</sup>      | Bilateral arm flexion, shoulder adduction and hand raising to chest, face or endotracheal tube with dystonic posturing of the fingers |
| Limb elevation <sup>54</sup>             | Raising of limbs off the bed                                                                                                          |
| Myoclonus <sup>56</sup>                  | Twitching or contraction of a muscle or group of muscles                                                                              |
| Plantar response <sup>56</sup>           | Plantar flexion                                                                                                                       |
| Pronator-extension <sup>56</sup>         | Pronation and extension of the upper extremity                                                                                        |
| Respiratory-like movements <sup>54</sup> | Adduction of both shoulders followed by a slow cough-like movement                                                                    |
| Repetitive leg movements <sup>65</sup>   | Slight flexion of the leg and foot                                                                                                    |
| Thumbs Up Sign <sup>70</sup>             | Isolated thumb extension                                                                                                              |
| Triple flexion <sup>56</sup>             | Flexion of the thigh, leg and foot                                                                                                    |
| Undulating toe <sup>54</sup>             | Slow flexion then extension of the toes                                                                                               |



## Recommendations and Suggestions

1. It is recommended that BD/DNC first and foremost be a clinical determination.
2. It is recommended that an assessment for determination of BD/DNC be made in all persons with devastating brain injuries who are believed to potentially meet criteria for BD/DNC, regardless of whether or not they are potential organ donors.
3. It is recommended that all of the following neurological assessments be performed as part of the minimum determination of BD/DNC. If a portion of the clinical exam cannot be done, it is recommended that the remainder be completed to the fullest extent possible. If any aspect of the clinical examination cannot be completed (except as stipulated below), but the exam, to the extent completed, is consistent with BD/DNC, ancillary testing is recommended.
  - a. **Coma** – there is no evidence of arousal or awareness to maximal external stimulation (including noxious visual, auditory and tactile stimulation).

### b. Pupillary reflexes

|                                 |                                                                                                                                                                                                                                                                                                                                                                                                                                                                                                                                                                                                             |
|---------------------------------|-------------------------------------------------------------------------------------------------------------------------------------------------------------------------------------------------------------------------------------------------------------------------------------------------------------------------------------------------------------------------------------------------------------------------------------------------------------------------------------------------------------------------------------------------------------------------------------------------------------|
| Test                            | Shine a bright light into each of the person's eyes, looking for pupillary constriction and measuring the diameter of the pupils. Use of a magnifying glass and/or pupillometer is suggested.                                                                                                                                                                                                                                                                                                                                                                                                               |
| Response consistent with BD/DNC | There should be absence of ipsilateral and contralateral pupillary response, with pupils fixed in a midsize or dilated position (~4-6 mm), in both eyes.                                                                                                                                                                                                                                                                                                                                                                                                                                                    |
| Considerations                  | <ul style="list-style-type: none"><li>• Constricted pupils are not consistent with BD/DNC and suggest the possibility of drug intoxication or locked-in syndrome.</li><li>• Pupils can be any shape (round/oval/irregular).</li><li>• Corneal trauma or prior ophthalmic surgery may influence pupillary reactivity and preclude adequate evaluation, necessitating ancillary testing.</li><li>• Ocular instillation of drugs may artificially produce transiently nonreactive pupils.</li><li>• In the setting of anophthalmia or inability to see the pupils, ancillary testing is recommended.</li></ul> |

### c. Oculocephalic (OCR) and oculovestibular (OVR) reflexes

|      |                                                                                                                                                                                                                                                                                                                                                                                                                                                                                                                                                                                                                         |
|------|-------------------------------------------------------------------------------------------------------------------------------------------------------------------------------------------------------------------------------------------------------------------------------------------------------------------------------------------------------------------------------------------------------------------------------------------------------------------------------------------------------------------------------------------------------------------------------------------------------------------------|
| Test | <p>OCR: Rotate the head briskly horizontally to both sides. There should be no movement of the eyes relative to head movement. Testing vertically is optional.</p> <p>OVR: Examine the auditory canal for patency and an intact tympanic membrane. Elevate the head to 30° to place the horizontal semicircular canals in the correct vertical position. Irrigate with ≥ 30 mL of ice water for at least 60 seconds using a syringe or a syringe attached to a catheter placed inside the canal. Test both sides separately and with a 5-minute interval between to allow the endolymph temperature to equilibrate.</p> |
|------|-------------------------------------------------------------------------------------------------------------------------------------------------------------------------------------------------------------------------------------------------------------------------------------------------------------------------------------------------------------------------------------------------------------------------------------------------------------------------------------------------------------------------------------------------------------------------------------------------------------------------|

|                                 |                                                                                                                                                                                                                                                                                                                                                                                                                                                                                                                                                                                                                                                                                                                                                                                                                                                                                               |
|---------------------------------|-----------------------------------------------------------------------------------------------------------------------------------------------------------------------------------------------------------------------------------------------------------------------------------------------------------------------------------------------------------------------------------------------------------------------------------------------------------------------------------------------------------------------------------------------------------------------------------------------------------------------------------------------------------------------------------------------------------------------------------------------------------------------------------------------------------------------------------------------------------------------------------------------|
| Response consistent with BD/DNC | Detection of any extraocular movements is not compatible with BD/DNC.                                                                                                                                                                                                                                                                                                                                                                                                                                                                                                                                                                                                                                                                                                                                                                                                                         |
| Considerations                  | <ul style="list-style-type: none"> <li>• Confirm the integrity of the cervical spine before proceeding with the OCR test. If the OCR cannot be performed, but the OVR is performed and there are no extraocular movements, ancillary testing is not required.</li> <li>• Ensure the integrity of the tympanic membrane. Presence of a ruptured tympanic membrane does not negate the clinical testing but may risk introducing infections in the ear.</li> <li>• A fracture of the base of the skull or petrous temporal bone may obliterate the response on the side of the fracture, and ancillary testing is recommended in this instance.</li> <li>• Severe orbital or scleral edema or chemosis may affect the free motion of the globes, and ancillary testing is recommended in this instance.</li> <li>• In the setting of anophthalmia, ancillary testing is recommended.</li> </ul> |

**d. Corneal reflex**

|                                 |                                                                                                                                                                                                                                                                       |
|---------------------------------|-----------------------------------------------------------------------------------------------------------------------------------------------------------------------------------------------------------------------------------------------------------------------|
| Test                            | Touch the cornea of both eyes with a cotton swab on a stick at the external border of the iris, applying light pressure and observing for any eyelid movement.                                                                                                        |
| Response consistent with BD/DNC | No eyelid movement should be seen.                                                                                                                                                                                                                                    |
| Considerations                  | <ul style="list-style-type: none"> <li>• Care should be taken to avoid damaging the cornea.</li> <li>• In the setting of anophthalmia, severe orbital edema, prior corneal transplantation or scleral edema or chemosis, ancillary testing is recommended.</li> </ul> |

**e. Motor responses of the face and limbs**

|      |                                                                                                                                                                                                                                                                                                                                                                                                             |
|------|-------------------------------------------------------------------------------------------------------------------------------------------------------------------------------------------------------------------------------------------------------------------------------------------------------------------------------------------------------------------------------------------------------------|
| Test | <p>Apply deep pressure to all of the following:</p> <ul style="list-style-type: none"> <li>i. the condyles at the level of the temporomandibular joints</li> <li>ii. the supraorbital notch bilaterally</li> <li>iii. the sternal notch</li> <li>iv. all four extremities, both proximally and distally.</li> </ul> <p>Insert a cotton swab on a stick in each nostril to perform nasal tickle testing.</p> |
|------|-------------------------------------------------------------------------------------------------------------------------------------------------------------------------------------------------------------------------------------------------------------------------------------------------------------------------------------------------------------------------------------------------------------|

|                                 |                                                                                                                                                                                                                                                                                                                                                                                                                                                                                                                                                                                                                                                                                                                                                                                                                                                                              |
|---------------------------------|------------------------------------------------------------------------------------------------------------------------------------------------------------------------------------------------------------------------------------------------------------------------------------------------------------------------------------------------------------------------------------------------------------------------------------------------------------------------------------------------------------------------------------------------------------------------------------------------------------------------------------------------------------------------------------------------------------------------------------------------------------------------------------------------------------------------------------------------------------------------------|
| Response consistent with BD/DNC | <p>Noxious stimuli should not produce grimacing, facial muscle movement or a motor response of the limbs other than spinally-mediated reflexes.</p> <p>Noxious stimuli above the foramen magnum should not produce any movement in the face or body. Noxious stimuli below the foramen magnum should not produce any movement in the face but may elicit spinal cord reflexes.</p>                                                                                                                                                                                                                                                                                                                                                                                                                                                                                           |
| Considerations                  | <ul style="list-style-type: none"> <li>• The clinical differentiation of spinal responses from brain-mediated motor responses requires expertise. Consultation with an experienced practitioner is recommended if the origin of a response is unclear. Alternatively, if interpretation is unclear, ancillary testing is recommended.</li> <li>• Ancillary testing is recommended if a person has a pre-existing severe neuromuscular disorder, such as amyotrophic lateral sclerosis or a pre-existing severe sensory neuropathy.</li> <li>• Ancillary testing is not required if a person does not have all four limbs; absence of a limb does not preclude motor testing to pain on that side of the body.</li> <li>• Severe facial trauma and swelling may preclude evaluation of facial motor response, so ancillary testing is recommended in this setting.</li> </ul> |

#### **f. Gag and cough reflexes**

|                                 |                                                                                                                                                                                                                                               |
|---------------------------------|-----------------------------------------------------------------------------------------------------------------------------------------------------------------------------------------------------------------------------------------------|
| Test                            | <p>Stimulate the posterior pharyngeal wall bilaterally with a tongue depressor or suction catheter.</p> <p>Stimulate the tracheo-bronchial wall to the level of the carina with deep endotracheal placement of a suction catheter.</p>        |
| Response consistent with BD/DNC | Absence of cough and gag reflexes.                                                                                                                                                                                                            |
| Considerations                  | <ul style="list-style-type: none"> <li>• The efferent limb for the cough reflex includes the phrenic nerve, which may be injured in persons with high cervical cord injuries, so ancillary testing is recommended in this setting.</li> </ul> |

### **III. Apnea Testing**

Apnea testing is part of nearly all protocols for determination of BD/DNC.<sup>1,2,39-41</sup> The goal of the apnea test is to allow the serum carbon dioxide to increase and the cerebrospinal fluid pH to decrease to a level that would normally maximally stimulate the respiratory centers in a functioning medulla.<sup>71</sup> If there is no medullary function, the person will not make any respiratory effort in the setting of profound hypercarbia and acidosis. Although hypoxia depresses neuronal metabolism, it does not stimulate the central chemoreceptors to trigger ventilation in adults.<sup>72</sup>

## Prerequisites

The generally accepted prerequisites for apnea testing include 1) absence of spontaneous respirations (i.e. breathing above the set ventilator rate), 2) normotension, 3) normothermia, 4) euvolemia, 5) eucapnia, and 6) absence of hypoxia.<sup>1,2,39-41</sup> Hemodynamic instability, hypoxia and high ventilator requirements may dissuade practitioners from performing apnea testing, as evidenced by the results of a large series of BD/DNC decedents in which an apnea test was not performed in 7% of the patients because of hemodynamic instability or poor oxygenation at baseline. Polytrauma resulting in BD/DNC was significantly more common in persons in whom apnea testing was not attempted.<sup>73</sup>

With regards to performing an assessment for absence of spontaneous respirations, it is worth noting that ventilatory autotriggering can falsely make it appear that a person is breathing spontaneously. This occurs when the ventilator is set on a spontaneous breathing mode (pressure support ventilation) and either extrinsic or intrinsic factors generate sufficient change in airflow or negative pressure to exceed the trigger threshold and lead to a delivered breath.<sup>74-79</sup> Extrinsic causes for autotriggering include excessive condensation in ventilator tubing, endotracheal tube leak, chest tubes, and random artifacts or noise in the ventilator circuit, while intrinsic causes include cardiogenic oscillation, especially in a hyperdynamic cardiovascular state,<sup>77</sup> or abdominal muscle contractions representing spinal reflexes.<sup>61</sup> However, autotriggering can be mitigated by setting the flow or pressure trigger above the threshold value and confirming absence of breathing while observing the person off the ventilatory circuit.<sup>75</sup>

## Procedure

The most commonly employed procedure for apnea testing is disconnection from the ventilator while monitoring for spontaneous respirations, with or without the provision of oxygen.<sup>1,2,39-41</sup> Prior to testing, the person is pre-oxygenated for 10-15 minutes and the ventilator settings are adjusted such that the PaCO<sub>2</sub> normalizes at 35-40 mmHg (4.7-5.3 kPa) (eucapnia) or mild hypercapnia (PaCO<sub>2</sub> 45 mmHg, 6.0 kPa). Once the PaCO<sub>2</sub> is appropriate, the endotracheal tube (ETT) is disconnected from the ventilator. When the oxygen insufflation method is used, a small cannula is advanced through the ETT to approximately the level of the carina to deliver oxygen at 4-6 L/min. The chest and abdomen are exposed to allow practitioners to closely observe the person for spontaneous respiratory movements. If any respirations are seen, the test is aborted, as it is clear that the person is not brain dead.

If there are no spontaneous respirations, an arterial blood gas is drawn eight to ten minutes after initiation of the test. If point-of-care testing is available and the person is stable, they can be kept off the ventilator until it is determined that the PaCO<sub>2</sub> has risen adequately. If it is not, they are reconnected to the ventilator when the arterial blood gas is sent. The specific PaCO<sub>2</sub> goal varies, but the goal is generally  $\geq 50$  or  $\geq 60$  mmHg ( $\geq 6.7$  or  $8.0$  kPa). Many protocols also indicate that a higher target is needed in the setting of prior CO<sub>2</sub> retention (such as 20 mmHg (2.7 kPa) above a known chronic baseline PaCO<sub>2</sub>).<sup>1,2,39-41,80</sup> In some cases, end-tidal continuous capnometry or transcutaneous monitoring is used to monitor the carbon dioxide level during apnea testing, but it is important to note that this value may not accurately reflect the arterial PaCO<sub>2</sub>.<sup>81-83</sup>

In some cases, a pH goal is provided. The specific target varies; some guidelines aim for  $< 7.4$  or  $\leq 7.28$ .<sup>39,80</sup> Notably, it is cerebrospinal fluid acidosis not acidemia that triggers respiratory movements,

and while arterial and cerebrospinal fluid hydrogen concentration are similar in the setting of hypercapnia, arterial and cerebrospinal fluid bicarbonate concentration are not.<sup>72,84</sup>

If the PaCO<sub>2</sub> does not reach the target level, and point-of-care testing is used, the test is continued for another 5 minutes, then the arterial blood gas is rechecked. If point-of-care testing is not used, the test is repeated for a longer period of time (15 minutes) after repeat pre-oxygenation and re-establishment of normocarbemia if the person is stable. If the test cannot be repeated due to instability, an ancillary test or testing using alternative methods is needed.<sup>39,40,85</sup> Alternative methods of apnea testing include: 1) use of continuous positive airway pressure (CPAP) 10 cm H<sub>2</sub>O, and 100% O<sub>2</sub> 12 L/min provided directly by the ventilator, through the use of a T-piece tube with a CPAP valve at the outflow end, or through the use of a T-piece system with a *collapsible* reservoir bag and adjustable outflow resistance;<sup>40,86,87</sup> 2) use of bulk diffusion (provision of 100% FiO<sub>2</sub> on high flow (40-60 L/min) at the orifice of the endotracheal tube via the ventilator circuitry (with CPAP set at zero or with the ventilator off and disconnected from the expiratory humidity trap);<sup>88</sup> or 3) carbon dioxide augmentation.<sup>82,89</sup> Use of a T-piece circuit entails connection to the endotracheal tube or a flow-inflating anesthesia bag with titration of end expiratory pressure. Tracheal insufflation is less favored, particularly in younger children/infants/newborns due to carbon dioxide washout. The oxygen diffusion method is considered the most common technique, and safe,<sup>90</sup> although a recent head-to-head comparison with CPAP showed a relative preservation of oxygenation with the latter technique.<sup>91</sup> Apnea testing in the prone position has been reported in a hypoxemic BD/DNC patient.<sup>92</sup>

### **Risks and Complications Associated with the Apnea Test**

There are reports of persons undergoing apnea testing who have developed hypoxemia, hypotension, arrhythmias, cardiac arrest and barotrauma.<sup>73,85,93-97</sup> As a result, guidelines routinely recommend that: 1) the person be observed for desaturation, and the test be aborted if hypoxia develops; 2) the person be observed for hypotension, which can develop as respiratory acidosis is induced due to direct dilatation of the peripheral arterioles and depression of myocardial contractility by CO<sub>2</sub> elevation, and the test be aborted if the systolic blood pressure decreases below normotension despite use of vasopressors.<sup>1,2,39-41,98</sup> Even if the prerequisites for apnea testing are met, the test needs to be aborted prematurely in 1.6-4.8% of the cases.<sup>85,93,99</sup> One study found that younger age and pre-test acidemia (pH 7.29 vs. 7.39) were associated with test completion failure.<sup>99</sup>

The risk for barotrauma leading to pneumothorax, pneumomediastinum or pneumoperitoneum during apnea testing stems from: 1) the fact that oxygen could be trapped inside the lungs if the ratio between the diameter of the cannula and the endotracheal tube is large or there are dry secretions obstructing the flow out; 2) the cannula is placed too deep; or 3) the cannula perforates the trachea.<sup>100-108</sup> An oxygen insufflation study found that endotracheal tube/cannula diameter ratio < 1.75, cannula tip in the distal third of the ETT and O<sub>2</sub> flow rate > 10 L/min were associated with higher airway pressure in the trachea.<sup>100</sup> Other authors have also noted that the internal cannula diameter to endotracheal tube diameter ratio should not be larger than 0.6-0.7.<sup>101</sup> In addition to the risk of barotrauma, it has also been demonstrated that higher oxygen flow rates may result in CO<sub>2</sub> washout, decreasing the speed of CO<sub>2</sub> elevation, or even decreasing the PaCO<sub>2</sub> over time.<sup>94,109</sup>

Lastly, it is theoretically possible, although unproven, that secondary injury can occur to the brain during apnea testing due to elevation of intracranial pressure (ICP) secondary to hypercarbic cerebral vasodilation, and that this injury could in fact cause BD/DNC.<sup>110,111</sup> Because of this, some have suggested that apnea test only be performed after ancillary testing shows absent cerebral blood flow.<sup>111,112</sup> Notably, a study by Ma et al showed that 10% of patients with a clinical examination otherwise consistent with BD/DNC showed respiratory effort during apnea testing.<sup>113</sup> A recent study with intracranial monitoring during apnea testing did not show significant changes in intracranial pressure or cerebral perfusion pressure.<sup>114</sup>

### **Recommendations and Suggestions**

1. Because there is concern that apnea testing may elevate intracranial pressure, it is recommended that:
  - a. The apnea test be conducted last, after the rest of the clinical evaluation is completed and found to be consistent with BD/DNC, and
  - b. It has been determined that the person is not taking any spontaneous respirations when the ventilator is set on a spontaneous breathing mode in a normocarbic state, and
  - c. The test is performed by personnel with experience in resuscitation should the patient decompensate during testing.
2. It is recommended that ventilator requirements and pulmonary status be assessed before apnea testing to determine whether a person is likely to tolerate the evaluation.
3. In the setting of a high cervical cord injury, it is recommended that an apnea test not be performed and ancillary testing is indicated.
4. It is suggested that before commencing the apnea test:
  - a. The systolic blood pressure be  $\geq 100$  mmHg or mean arterial pressure be  $\geq 60$  mmHg in adults (age appropriate targets in pediatrics) with use of vascular volume, vasopressors and/or inotropes as needed,
  - b. Temperature be  $\geq 36^{\circ}\text{C}$ , with use of a warming blanket, automated temperature regulation device, thermal mattress, warmed fluids and/or warmed oxygen as needed,
  - c. The person be pre-oxygenated with 100% O<sub>2</sub> for at least 10 minutes.
5. It is suggested the minute ventilation be adjusted to establish normocarbica (PaCO<sub>2</sub> of 35-45 mmHg (4.7-6.0 kPa)) prior to apnea testing, confirmed by arterial blood gas testing prior to apnea testing.
6. It is suggested that a functioning arterial line be employed to provide continuous blood pressure monitoring and to quickly draw blood gases during apnea testing.
7. It is suggested that the following techniques may be used for apnea testing:
  - a. The application of positive airway pressure with the use of CPAP/PEEP may prevent derecruitment and decrease the risk of cardiopulmonary instability, so 100% oxygen can be

- delivered to the lungs (i) via CPAP on the mechanical ventilator or (ii) via resuscitation bag with a functioning PEEP valve,
- b. Oxygen can also be delivered via the oxygen insufflation method via placement of a tracheal cannula.
8. It is suggested that the apnea test targets during testing be  $\text{pH} < 7.30$  and  $\text{PaCO}_2 \geq 60$  mmHg (8.0 kPa) unless a patient has pre-existing hypercapnia, in which case it should be  $\geq 20$  mmHg (2.7 kPa) above their baseline  $\text{PaCO}_2$ , if known.
  9. It is recommended that apnea testing be aborted if:
    - a. Spontaneous respirations are witnessed during apnea testing,
    - b. Systolic blood pressure becomes  $< 100$  mmHg or mean arterial pressure becomes  $< 60$  mmHg despite titration of fluids/inotropes/vasopressors,
    - c. There is sustained oxygen desaturation below 85%,
    - d. An unstable arrhythmia occurs.
  10. It is recommended that an arterial blood gas be tested 10 minutes after commencing apnea testing.
    - a. If point-of-care testing is available and the person is stable, they can be kept off the ventilator with repeated arterial blood gas sampling every 2-3 minutes until it is determined that the  $\text{PaCO}_2$  is  $\geq 60$  mmHg ( $\geq 20$  mmHg above any known chronic baseline  $\text{PaCO}_2$  in persons with pre-existing hypercapnia).
    - b. If point-of-care testing is not available, the person should be reconnected to the ventilator when the arterial blood gas is sent.
  11. It is suggested that, while non-invasive capnography may guide the duration of apneic observation, the arterial  $\text{PaCO}_2$  be used to confirm adequate elevation of  $\text{CO}_2$  during apnea testing.
  12. If the apnea test is inconclusive (does not reach  $\text{PaCO}_2$  goals) but the patient was stable during testing from pulmonary and hemodynamic standpoints, it is suggested that the test be repeated after re-establishing pre-oxygenation, normocapnea and a normal pH, and extending the test by several minutes, employing the same technique and parameters as above.
  13. It is suggested that prior to aborting the apnea test because of cardiorespiratory instability, an arterial blood gas (ABG) be sent for testing. If the  $\text{PaCO}_2$  target is met, the apnea test can be considered positive (consistent with BD/DNC).
  14. It is suggested that if the apnea test has been aborted because spontaneous respirations are witnessed during testing, apnea testing should be repeated after 24 hours if the clinical exam remains consistent with BD/DNC.
  15. If the apnea test is aborted and cannot be repeated safely, it is suggested that either an ancillary test be performed, or apnea testing be attempted after pre-apnea recruitment maneuvers, induction of hypercarbia with  $\text{CO}_2$  or carbogen before disconnecting from the ventilator, or utilizing CPAP

to maintain oxygenation.

#### **IV. Number of Examinations**

The number of clinical exams required to pronounce BD/DNC varies according to age, hospital, state or country, and generally ranges from 1-3.<sup>1,38,48</sup> Arguments for conducting two exams include mitigation of the potential for diagnostic error and improvement of familial confidence in the diagnosis of BD/DNC. Arguments against waiting for a second exam are that up to 12% of persons may experience cardiac arrest during the waiting period; organ donation consent decreases as the BD/DNC declaration interval increases; and, most importantly, in a review of 1,229 declarations of BD/DNC, none of the persons declared BD/DNC on the initial exam had any evidence of brain activity on the subsequent exam.<sup>115</sup> These concerns might be ameliorated if two examinations take place concomitantly or in relatively quick succession.

Presently, in places in which multiple exams are performed, the number of examiners and timing of the exams varies.<sup>38</sup> In Canada, when organ donation for the purposes of transplant is planned, BD/DNC is determined by at least two physicians. The exams can be done concurrently, but if done at different times, they are full exams including apnea tests at both times.<sup>80</sup> In the United Kingdom, two full consecutive exams (including two apnea tests) by two physicians observing each other on two occasions are required. No inter-observer period is required.<sup>39</sup> In Australia and New Zealand, two full exams (including apnea testing with each) by two different physicians are needed. The tests may be done consecutively, but not simultaneously. There is no requirement for one doctor to be present during the test performed by the other doctor, but such presence is acceptable. No fixed interval between the two clinical tests is required, except where age-related criteria apply (neonates and children).<sup>41</sup> In the United States, only a single examination is required in adults.<sup>40</sup>

#### **Recommendations and Suggestions**

1. It is suggested that a single exam, including apnea testing, is the minimum standard for determination of BD/DNC for adults.
2. If 2 evaluations are performed:
  - a. It is suggested that an intervening time period is unnecessary because if the prerequisite of irreversibility (which includes an observation period prior to initiating testing) has been satisfied, a second observation period is redundant,
  - b. It is suggested that the examinations be performed by two separate examiners,
  - c. It is suggested that only 1 positive apnea test be performed in adults.

(See Pediatric and Neonatal Brain Death chapter for recommendations for pediatrics).



## Questions to Inform Research Agendas

1. When the presence of drug intoxication is unclear and the pupils are not mid-position to dilated, should naloxone be routinely administered before conducting a BD/DNC determination? What dosing recommendations are reliable?
2. What is the impact of corneal transplant or cataract surgery on ocular examinations?
3. What method of performing apnea testing is associated with the lowest risk of complications?
4. What is the highest PaCO<sub>2</sub> and lowest pH at which a person has the potential to breathe?
5. Should there be a different PaCO<sub>2</sub> target at high altitudes?
6. Is neuroimaging evidence of severe intracranial hypertension, including the presence and severity of cerebral edema and pontomedullary herniation, predictive of, or correlated with:
  - a. Fulfillment of clinical criteria for BD/DNC prior to apnea testing?
  - b. Absence of spontaneous breathing during the apnea test?
  - c. Absence of brain blood flow on ancillary testing?

## References

1. Wijdicks EF. Brain death worldwide: Accepted fact but no global consensus in diagnostic criteria. *Neurology*. 2002;58:20-25.
2. Shemie SD, Hornby L, Baker A, Teitelbaum J, Torrance S, Young K, et al. International guideline development for the determination of death. *Intensive Care Medicine*. 2014;40(6):788-797.
3. Kung NH, Dhar R, Keyrouz SG. Diffuse leptomeningeal carcinomatosis mimicking brain death. *Journal of the neurological sciences*. 2015;352(1-2):132-134.
4. Rigamonti A, Basso F, Stanzani L, Agostoni E, Lauria G. Guillain-Barre syndrome mimicking brain death. *Journal of the peripheral nervous system : JPNS*. 2009;14(4):316-319.
5. Vargas F, Hilbert G, Gruson D, Valentino R, Gbikpi-Benissan G, Cardinaud JP. Fulminant Guillain-Barre syndrome mimicking cerebral death: case report and literature review. *Intensive Care Med*. 2000;26(5):623-627.
6. Moussouttas M, Chandy D, Dyro F. Fulminant acute inflammatory demyelinating polyradiculoneuropathy: case report and literature review. *Neurocritical care*. 2004;1(4):469-473.
7. Young GB. De-efferentation and de-afferentation in fulminant polyneuropathy: lessons from the isolated brain. *The Canadian journal of neurological sciences Le journal canadien des sciences neurologiques*. 2003;30(4):305-306.
8. Liik M, Puksa L, Luus SM, Haldre S, Taba P. Fulminant inflammatory neuropathy mimicking cerebral death. *BMJ case reports*. 2012;2012.
9. Bakshi N, Maselli RA, Gospe SM, Jr., Ellis WG, McDonald C, Mandler RN. Fulminant demyelinating neuropathy mimicking cerebral death. *Muscle & nerve*. 1997;20(12):1595-1597.
10. Marti-Masso JF, Suarez J, Lopez de Munain A, Carrera N. Clinical signs of brain death simulated by Guillain-Barre syndrome. *Journal of the neurological sciences*. 1993;120(1):115-117.
11. Ravikumar S, Poysophon P, Poblete R, Kim-Tenser M. A Case of Acute Motor Axonal Neuropathy Mimicking Brain Death and Review of the Literature. *Front Neurol*. 2016;7:63.
12. Bernard V, Van Pesch V, Hantson P. Guillain-Barre syndrome mimicking brain death pattern: a poorly reversible condition. *Acta neurologica Belgica*. 2010;110(1):93-96.
13. Tan CY, Ahmad SB, Goh KJ, Latif LA, Shahrizaila N. Overlap of Bickerstaff brainstem encephalitis/Guillain-Barre syndrome simulating brain death. *Neurol India*. 2018;66(5):1475-1480.
14. Hantson P, Guerit JM, de Tourchaninoff M, et al. Rabies encephalitis mimicking the electrophysiological pattern of brain death. A case report. *European neurology*. 1993;33(3):212-217.

15. John J, Gane BD, Plakkal N, Aghoram R, Sampath S. Snake bite mimicking brain death. *Cases journal*. 2008;1(1):16.
16. Dayal M, Prakash S, Verma PK, Pawar M. Neurotoxin envenomation mimicking brain death in a child: A case report and review of literature. *Indian journal of anaesthesia*. 2014;58(4):458-460.
17. Anadure RK, Narayanan CS, Hande V, Singhal A, Varadaraj G. Two Cases of Early Morning Neuroparalytic Syndrome (EMNS) in the Tropics - Masquerading as Brain Death. *J Assoc Physicians India*. 2018;66(1):92-95.
18. Freund B, Hayes L, Rivera-Lara L, et al. Adult intestinal colonization botulism mimicking brain death. *Muscle Nerve*. 2017;56(4):E27-E28.
19. Hitawala A, Garg P, Jain A, Nahar A. Severe Hypokalemia Mimicking Brain Death. *Indian J Crit Care Med*. 2018;22(9):674-677.
20. Joffe AR, Anton N, Blackwood J. Brain death and the cervical spinal cord: a confounding factor for the clinical examination. *Spinal cord*. 2010;48:2-9.
21. Felton D, Carey, JL, Boyer, E, Neavyn, MJ. Brain death and overdose. *Clinical Toxicology*. 2014;52:419.
22. Lopez-Navidad A, Caballero F, Domingo P, et al. Early diagnosis of brain death in patients treated with central nervous system depressant drugs. *Transplantation*. 2000;70(1):131-135.
23. Morrow SA, Young GB. Selective abolition of the vestibular-ocular reflex by sedative drugs. *Neurocritical care*. 2007;6(1):45-48.
24. Schmidt JE, Tamburro RF, Hoffman GM. Dilated nonreactive pupils secondary to neuromuscular blockade. *Anesthesiology*. 2000;92(5):1476-1480.
25. Webb AC, Samuels OB. Reversible brain death after cardiopulmonary arrest and induced hypothermia. *Crit Care Med*. 2011;39(6):1538-1542.
26. Snively SR, Hodges GR. The neurotoxicity of antibacterial agents. *Annals of internal medicine*. 1984;101(1):92-104.
27. Roberge RJ, Krenzelok EP. Prolonged coma and loss of brainstem reflexes following amitriptyline overdose. *Veterinary and human toxicology*. 2001;43(1):42-44.
28. Auinger K, Muller V, Rudiger A, Maggiorini M. Valproic acid intoxication imitating brain death. *The American journal of emergency medicine*. 2009;27(9):1177.e1175-1176.
29. Stranges D, Lucerna A, Espinosa J, et al. A Lazarus effect: A case report of Bupropion overdose mimicking brain death. *World journal of emergency medicine*. 2018;9(1):67-69.
30. Ostermann ME, Young B, Sibbald WJ, Nicolle MW. Coma mimicking brain death following baclofen overdose. *Intensive Care Med*. 2000;26(8):1144-1146.
31. Sullivan R, Hodgman MJ, Kao L, Tormoehlen LM. Baclofen overdose mimicking brain death. *Clinical toxicology (Philadelphia, Pa)*. 2012;50(2):141-144.
32. Kuzniar TJ, Balagani R, Radigan KA, Factor P, Mutlu GM. Coma with absent brainstem reflexes resulting from zolpidem overdose. *American journal of therapeutics*. 2010;17(5):e172-174.
33. Peter JV, Prabhakar AT, Pichamuthu K. In-laws, insecticide--and a mimic of brain death. *Lancet*. 2008;371(9612):622.
34. Molina DK, McCutcheon JR, Rulon JJ. Head injuries, pentobarbital, and the determination of death. *The American journal of forensic medicine and pathology*. 2009;30(1):75-77.
35. Hirata K, Matsumoto Y, Kurokawa A, et al. Possibility of influence of midazolam sedation on the diagnosis of brain death: concentrations of active metabolites after cessation of midazolam. *Yakugaku zasshi : Journal of the Pharmaceutical Society of Japan*. 2003;123(9):811-815.
36. Meinitzer A, Zink M, Marz W, Baumgartner A, Halwachs-Baumann G. Midazolam and its metabolites in brain death diagnosis. *International journal of clinical pharmacology and therapeutics*. 2005;43(11):517-526.
37. Peters FT, Jung J, Kraemer T, Maurer HH. Fast, simple, and validated gas chromatographic-mass spectrometric assay for quantification of drugs relevant to diagnosis of brain death in human blood plasma samples. *Therapeutic drug monitoring*. 2005;27(3):334-344.
38. Greer DM, Wang HH, Robinson JD, Varelas PN, Henderson GV, Wijdicks EFM. Variability of Brain Death Policies in the United States. *JAMA Neurology*. 2016;73:213-218.
39. Academy of Medical Royal Colleges, Inventor. A code of practice for the diagnosis and confirmation of death. 2008.
40. Wijdicks EFM, Varelas PN, Gronseth GS, Greer DM. Evidence-based guideline update: Determining brain death in adults. *Neurology*. 2010;74:1911-1918.

41. Australian and New Zealand Intensive Care Society. The Anzics Statement on Death and Organ Donation. Vol 3.2. Melbourne: ANZICS; 2013.
42. Brunton L, Chabner B, B. K. Goodman & Gilman's The Pharmacological Basis of Therapeutics. *McGraw Hill*. 2011;ISBN 978-0-07-176939-6 p. 470, 549, 1899-1990.
43. Kennedy M, Kiloh N. Drugs and brain death. *Drug safety*. 1996;14(3):171-180.
44. Neavyn MJ, Stolbach A, Greer DM, et al. ACMT Position Statement: Determining Brain Death in Adults After Drug Overdose. *J Med Toxicol*. 2017;13(3):271-273.
45. Murray MJ, DeBlock H, Erstad B, et al. Clinical Practice Guidelines for Sustained Neuromuscular Blockade in the Adult Critically Ill Patient. *Crit Care Med*. 2016;44(11):2079-2103.
46. Lamy O, Jenzer-Closuit A, Burckhardt P. Hypercalcaemia of malignancy: an undiagnosed and undertreated disease. *J Intern Med*. 2001;250(1):73-79.
47. Shemie SD, Doig C, Dickens B, et al. Severe brain injury to neurological determination of death: Canadian forum recommendations. *CMAJ : Canadian Medical Association journal = journal de l'Association medicale canadienne*. 2006;174(6):S1-13.
48. Wahlster S, Wijidicks EFM, Patel PV, et al. Brain death declaration: Practices and perceptions worldwide. *Neurology*. 2015;84:1870-1879.
49. Nowak E, Pfitzner R, Przybylowski P. Polish Guidelines on Diagnosing Brain Death in Adults vs the International Perspective: Are We in Need of an Update? *Transplantation proceedings*. 2016;48(5):1394-1398.
50. Booth CM, Boone RH, Tomlinson G, Detsky AS. Is this patient dead, vegetative, or severely neurologically impaired? Assessing outcome for comatose survivors of cardiac arrest. *Jama*. 2004;291(7):870-879.
51. Larson MD, Muhiudeen I. Pupillometric analysis of the 'absent light reflex'. *Archives of neurology*. 1995;52(4):369-372.
52. Khandelwal A, Mishra RK, Singh S, Singh S, Rath GP. Dilated Pupil as a Diagnostic Component of Brain Death-Does it Really Matter? *J Neurosurg Anesthesiol*. 2018.
53. Huttemann E, Schelenz C, Sakka SG, Reinhart K. Atropine test and circulatory arrest in the fossa posterior assessed by transcranial Doppler. *Intensive Care Med*. 2000;26(4):422-425.
54. Jain S, DeGeorgia M. Brain death-associated reflexes and automatisms. *Neurocritical care*. 2005;3:122-126.
55. Dosemeci L, Cengiz M, Yilmaz M, Ramazanoglu A. Frequency of spinal reflex movements in brain-dead patients. *Transplantation proceedings*. 2004;36(1):17-19.
56. Saposnik G, Maurino J, Saizar R, Bueri JA. Spontaneous and reflex movements in 107 patients with brain death. *The American journal of medicine*. 2005;118(3):311-314.
57. Beckmann Y, Ciftci Y, Incesu TK, Secil Y, Akhan G. Spinal reflexes in brain death. *Acta neurologica Belgica*. 2014;114(4):303-306.
58. Hosseini MS, Ghorbani F, Ghobadi O, Najafizadeh K. Factors Affecting the Occurrence of Spinal Reflexes in Brain Dead Cases. *Experimental and clinical transplantation : official journal of the Middle East Society for Organ Transplantation*. 2015;13(4):309-312.
59. Spittler JF, Wortmann D, von Düring M, Gehlen W. Phenomenological diversity of spinal reflexes in brain death. *European journal of neurology*. 2000;7(3):315-321.
60. McNair NL, Meador KJ. The undulating toe flexion sign in brain death. *Movement disorders : official journal of the Movement Disorder Society*. 1992;7(4):345-347.
61. Mulazzani M, Wöber, C, Müller, C. Abdominal muscle contractions in brain death triggering the respirator: A case report. *Journal of neurology*. 2013;260:S94.
62. Bueri JA, Saposnik G, Maurino J, Saizar R, Garretto NS. Lazarus' sign in brain death. *Movement disorders : official journal of the Movement Disorder Society*. 2000;15(3):583-586.
63. de Freitas GR, Lima MA, Andre C. Complex spinal reflexes during transcranial Doppler ultrasound examination for the confirmation of brain death. *Acta Neurol Scand*. 2003;108(3):170-173.
64. Urasaki E, Tokimura T, Kumai J, Wada S, Yokota A. Preserved spinal dorsal horn potentials in a brain-dead patient with Lazarus' sign. Case report. *Journal of neurosurgery*. 1992;76(4):710-713.
65. Jung KY, Han SG, Lee KH, Chung CS. Repetitive leg movements mimicking periodic leg movement during sleep in a brain-dead patient. *European journal of neurology*. 2006;13(7):e3-4.
66. Zubkov AY, Wijidicks EF. Plantar flexion and flexion synergy in brain death. *Neurology*. 2008;70(19):e74.
67. Christie JM, O'Lenic TD, Cane RD. Head turning in brain death. *Journal of clinical anesthesia*. 1996;8(2):141-143.
68. Wu Y, Orizaola Balaguer P. Spontaneous and reflex head turning in brain death. *Critical care (London, England)*. 2013;17(4):440.

69. Rady MY, Verheijde JL. Movements after the clinical diagnosis of brain death: supraspinal motor responses or spinal reflexes. *Critical care (London, England)*. 2013;17(6):469.
70. Mittal MK, Arteaga GM, Wijdicks EF. Thumbs up sign in brain death. *Neurocritical care*. 2012;17(2):265-267.
71. Bruce EN, Cherniack NS. Central chemoreceptors. *Journal of applied physiology (Bethesda, Md : 1985)*. 1987;62(2):389-402.
72. Lust RM. Chemical Regulation of Respiration. In: Caplan M, ed. *Reference Module in Biomedical Sciences*: Elsevier; 2007.
73. Wijdicks EFM, Rabinstein AA, Manno EM, Atkinson JD. Pronouncing brain death: Contemporary practice and safety of the apnea test. *Neurology*. 2008;71:1240-1244.
74. Willatts SM, Drummond G. Brainstem death and ventilator trigger settings. *Anaesthesia*. 2000;55(7):676-677.
75. McGee WT, Mailloux P. Ventilator autocycling and delayed recognition of brain death. *Neurocritical care*. 2011;14(2):267-271.
76. Wijdicks EF, Manno EM, Holets SR. Ventilator self-cycling may falsely suggest patient effort during brain death determination. *Neurology*. 2005;65(5):774.
77. Dodd-Sullivan R, Quirin J, Newhart J. Ventilator autotriggering: a caution in brain death diagnosis. *Progress in transplantation (Aliso Viejo, Calif)*. 2011;21:152-155.
78. Arbour R, Morrison C. Ventilator autotriggering in a patient following massive intracerebral hemorrhage and brain death. *Crit Care Med*. 2016;44:548.
79. O'Leary MJ, Cavazzoni E, Gomez MP. Ventilator auto-triggering in brain death: still a trap for the unwary? *Critical care and resuscitation : journal of the Australasian Academy of Critical Care Medicine*. 2015;17(2):145.
80. Teitelbaum J, Shemi SD. Neurologic determination of death. *Neurol Clin*. 2011;29(4):787-799.
81. Kim HY, Kim G-S, Shin YH, Cha SR. The usefulness of end-tidal carbon dioxide monitoring during apnea test in brain-dead patients. *Korean Journal of Anesthesiology*. 2014;67:186.
82. Pepe J, Wolffing, A, Couture, M, Brautigam, R, Butler, K. Safety first: carbogen and capnography use minimizes complications during apnea testing. *Crit Care Med*. 2014;42:A1489-1490.
83. Vivien B, Amour J, Nicolas-Robin A, et al. An evaluation of capnography monitoring during the apnoea test in brain-dead patients. *European Journal of Anaesthesiology*. 2007;24:868-875.
84. Jennings DB, Davidson JS. Acid-base and ventilatory adaptation in conscious dogs during chronic hypercapnia. *Respiration physiology*. 1984;58(3):377-393.
85. Machado C, Perez J, Scherle C, Areu A, Pando A. Brain death diagnosis and apnea test safety. *Annals of Indian Academy of Neurology*. 2009;12(3):197-200.
86. Solek-Pastuszka J, Saucha W, Iwanczuk W, Bohatyrewicz R. Evolution of apnoea test in brain death diagnostics. *Anaesthesiology intensive therapy*. 2015;47(4):363-367.
87. Lévesque S, Lessard MR, Nicole PC, et al. Efficacy of a T-piece system and a continuous positive airway pressure system for apnea testing in the diagnosis of brain death\*. *Critical Care Medicine*. 2006;34(8):2213-2216.
88. al Jumah M, McLean DR, al Rajeh S, Crow N. Bulk diffusion apnea test in the diagnosis of brain death. *Crit Care Med*. 1992;20(11):1564-1567.
89. Lang CJ. Apnea testing by artificial CO2 augmentation. *Neurology*. 1995;45(5):966-969.
90. Daneshmand A, Rabinstein AA, Wijdicks EFM. The apnea test in brain death determination using oxygen diffusion method remains safe. *Neurology*. 2019;92(8):386-387.
91. Solek-Pastuszka J, Biernawska J, Iwanczuk W, et al. Comparison of Two Apnea Test Methods, Oxygen Insufflation and Continuous Positive Airway Pressure During Diagnosis of Brain Death: Final Report. *Neurocrit Care*. 2019;30(2):348-354.
92. Carneiro BV, Garcia GH, Isensee LP, Besen B. Optimization of conditions for apnea testing in a hypoxemic brain dead patient. *Rev Bras Ter Intensiva*. 2019;31(1):106-110.
93. Datar S, Fugate J, Rabinstein A, Couillard P, Wijdicks EFM. Completing the apnea test: decline in complications. *Neurocritical care*. 2014;21:392-396.
94. Kramer AH, Couillard P, Bader R, Dhillon P, Kutsogiannis DJ, Doig CJ. Prevention of Hypoxemia During Apnea Testing: A Comparison of Oxygen Insufflation And Continuous Positive Airway Pressure. *Neurocritical care*. 2017.
95. Melano R, Adum ME, Scarlatti A, Bazzano R, Araujo JL. Apnea test in diagnosis of brain death: comparison of two methods and analysis of complications. *Transplantation proceedings*. 2002;34:11-12.

96. Saposnik G, Rizzo G, Vega A, Sabbatiello R, Deluca JL. Problems associated with the apnea test in the diagnosis of brain death. *Neurology India*. 2004;52(3):342-345.
97. Wu X-l, Fang Q, Li L, Qiu Y-q, Luo B-y. Complications associated with the apnea test in the determination of the brain death. *Chinese medical journal*. 2008;121:1169-1172.
98. Ebata T, Watanabe Y, Amaha K, Hosaka Y, Takagi S. Haemodynamic changes during the apnoea test for diagnosis of brain death. *Canadian journal of anaesthesia = Journal canadien d'anesthesie*. 1991;38(4 Pt 1):436-440.
99. Yee AH, Mandrekar J, Rabinstein AA, Wijidicks EF. Predictors of Apnea Test Failure During Brain Death Determination. *Neurocritical care*. 2010;12:352-355.
100. Olguner C, Koca U, Akan M, Karci A, Elar Z. The safe limits of mechanical factors in the apnea testing for the diagnosis of brain death. *The Tohoku journal of experimental medicine*. 2007;211(2):115-120.
101. Henry NR, Marshall SG. Apnea Testing: The Effects of Insufflation Catheter Size and Flow on Pressure and Volume in a Test Lung. *Respiratory care*. 2014;59:406-410.
102. Zisfein J, Marks SJ. Tension pneumothorax and apnea tests. *Anesthesiology*. 1999;91(1):326.
103. Burns JD, Russell JA. Tension pneumothorax complicating apnea testing during brain death evaluation. *Journal of Clinical Neuroscience*. 2008;15:580-582.
104. Goranovic T, Milan Z, Martinac M, Kasi V. Barotrauma during apnea testing for the diagnosis of brainstem death. *Minerva anesthesiologica*. 2015;81(7):818.
105. Hasan N, Landsberg D. Bilateral tension pneumothoraces during apnea testing. *Journal of General Internal Medicine*. 2011;26:S416.
106. Brandstetter RD, Choi MY, Mallepalli VN, Klass S. An unusual cause of pulmonary barotrauma during apneic oxygenation testing. *Heart & lung : the journal of critical care*. 1994;23(1):88-89.
107. Gorton LE, Dhar R, Woodworth L, et al. Pneumothorax as a Complication of Apnea Testing for Brain Death. *Neurocritical care*. 2016;25(2):282-287.
108. Junsay R, Bencheqroun, HK. Tension pneumothorax during apnea test. *Am J Resp and Crit Care Med*. 2015;191.
109. Visram A, Marshall C. PaCO<sub>2</sub> and apnoea testing for brain stem death. *Anaesthesia*. 1997;52(1):87.
110. Truog RD, Tasker RC. Counterpoint: "Should informed consent be required for apnea testing in patients with suspected brain death?" Yes. *Chest*. 2017.
111. Tibballs J. A critique of the apneic oxygenation test for the diagnosis of ?brain death? *Pediatric Critical Care Medicine*. 2010;11:1.
112. Schwarz G, Litscher G, Pfurtscheller G, Schalk HV, Rumpl E, Fuchs G. Brain death: timing of apnea testing in primary brain stem lesion. *Intensive Care Med*. 1992;18(5):315-316.
113. Ma P-l, Yang M-s, Li Q, et al. Study on safety of apnea test in clinical determination of brain death. *Chinese critical care medicine* 2006;18:260-263.
114. Salih F, Hoffmann O, Brandt SA, et al. Safety of apnea testing for the diagnosis of brain death: a comprehensive study on neuromonitoring data and blood gas analysis. *Eur J Neurol*. 2019;26(6):887-892.
115. Lustbader D, O'Hara D, Wijidicks EFM, et al. Second brain death examination may negatively affect organ donation. *Neurology*. 2011;76:119-124.
